# Supplementary material
Source: PubMed Central journal article supplement (PMC2925488)

# Supplementary Figure 1

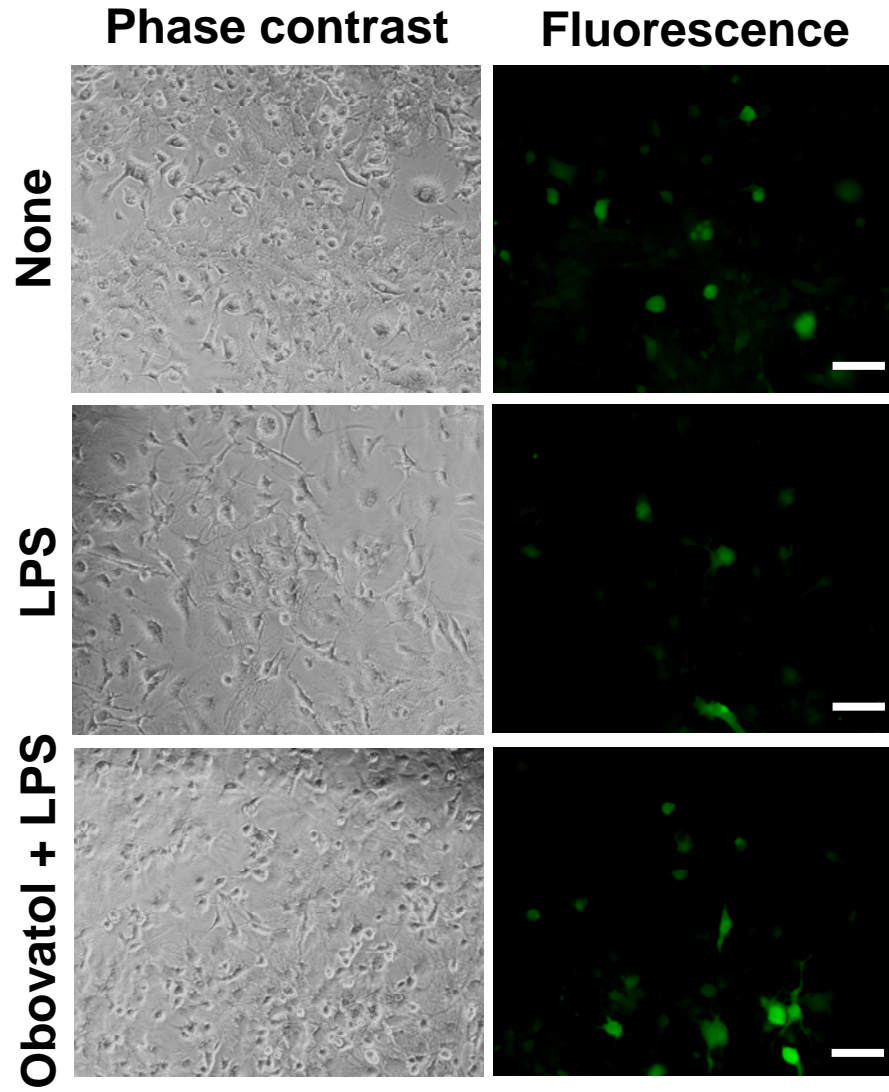

# Supplementary Figure 2

A

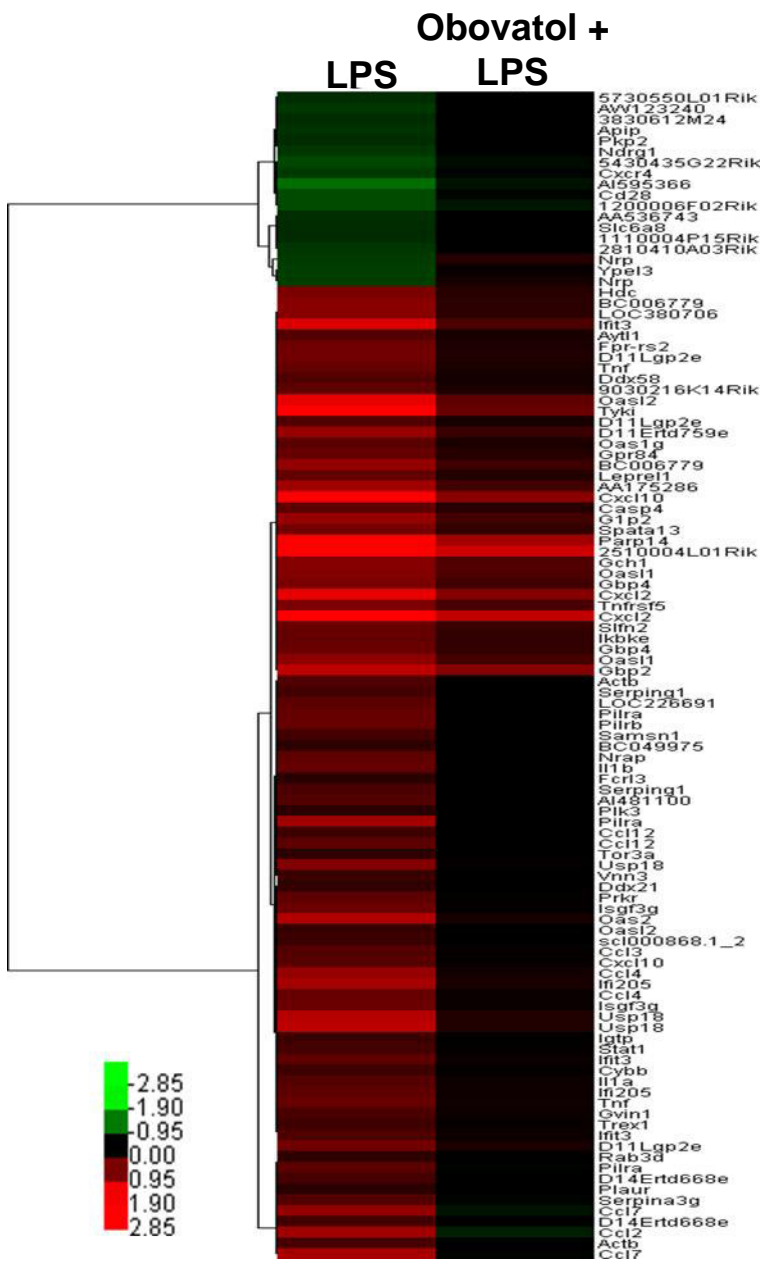

**B****Immunity/defense**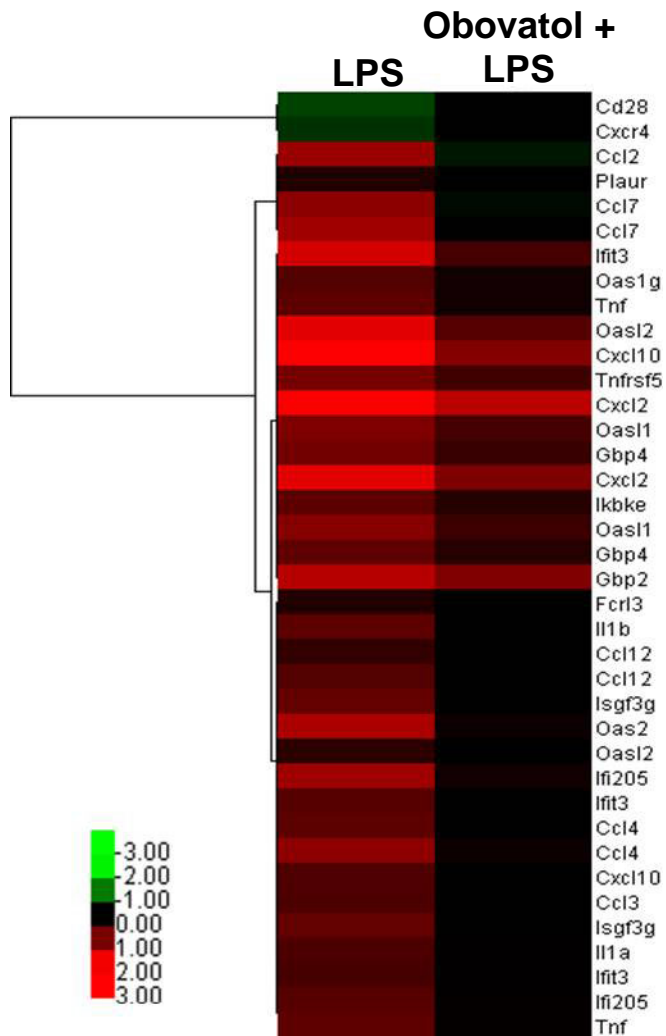**Signal transduction**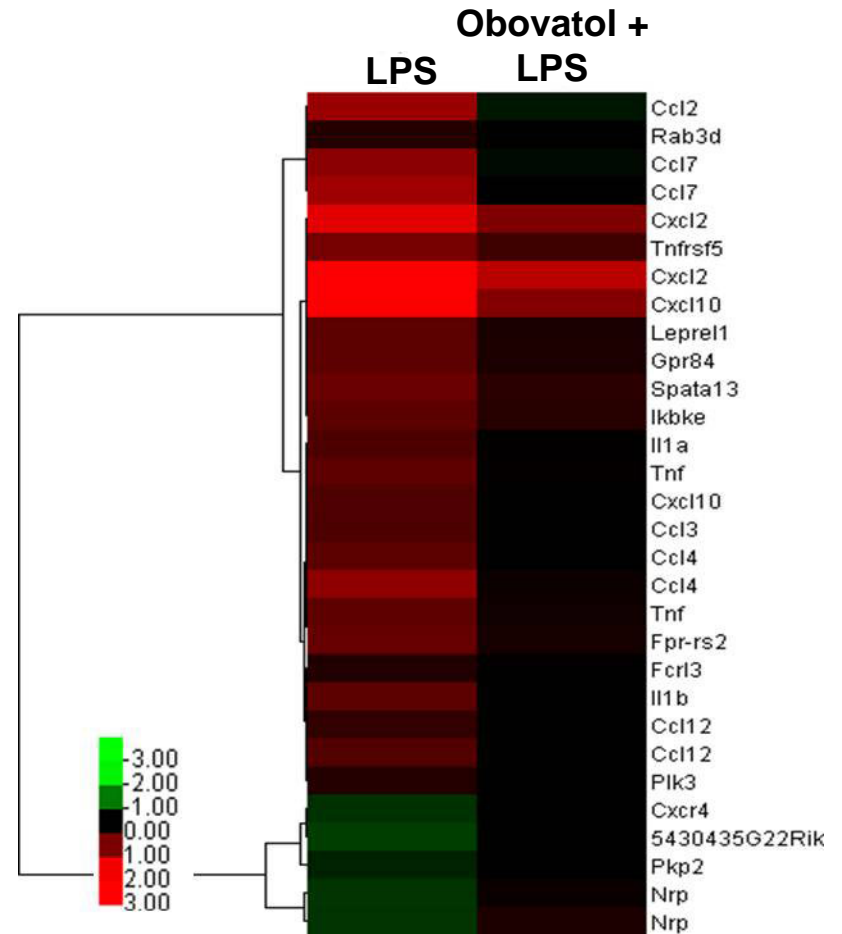

# Supplementary Figure 3

A

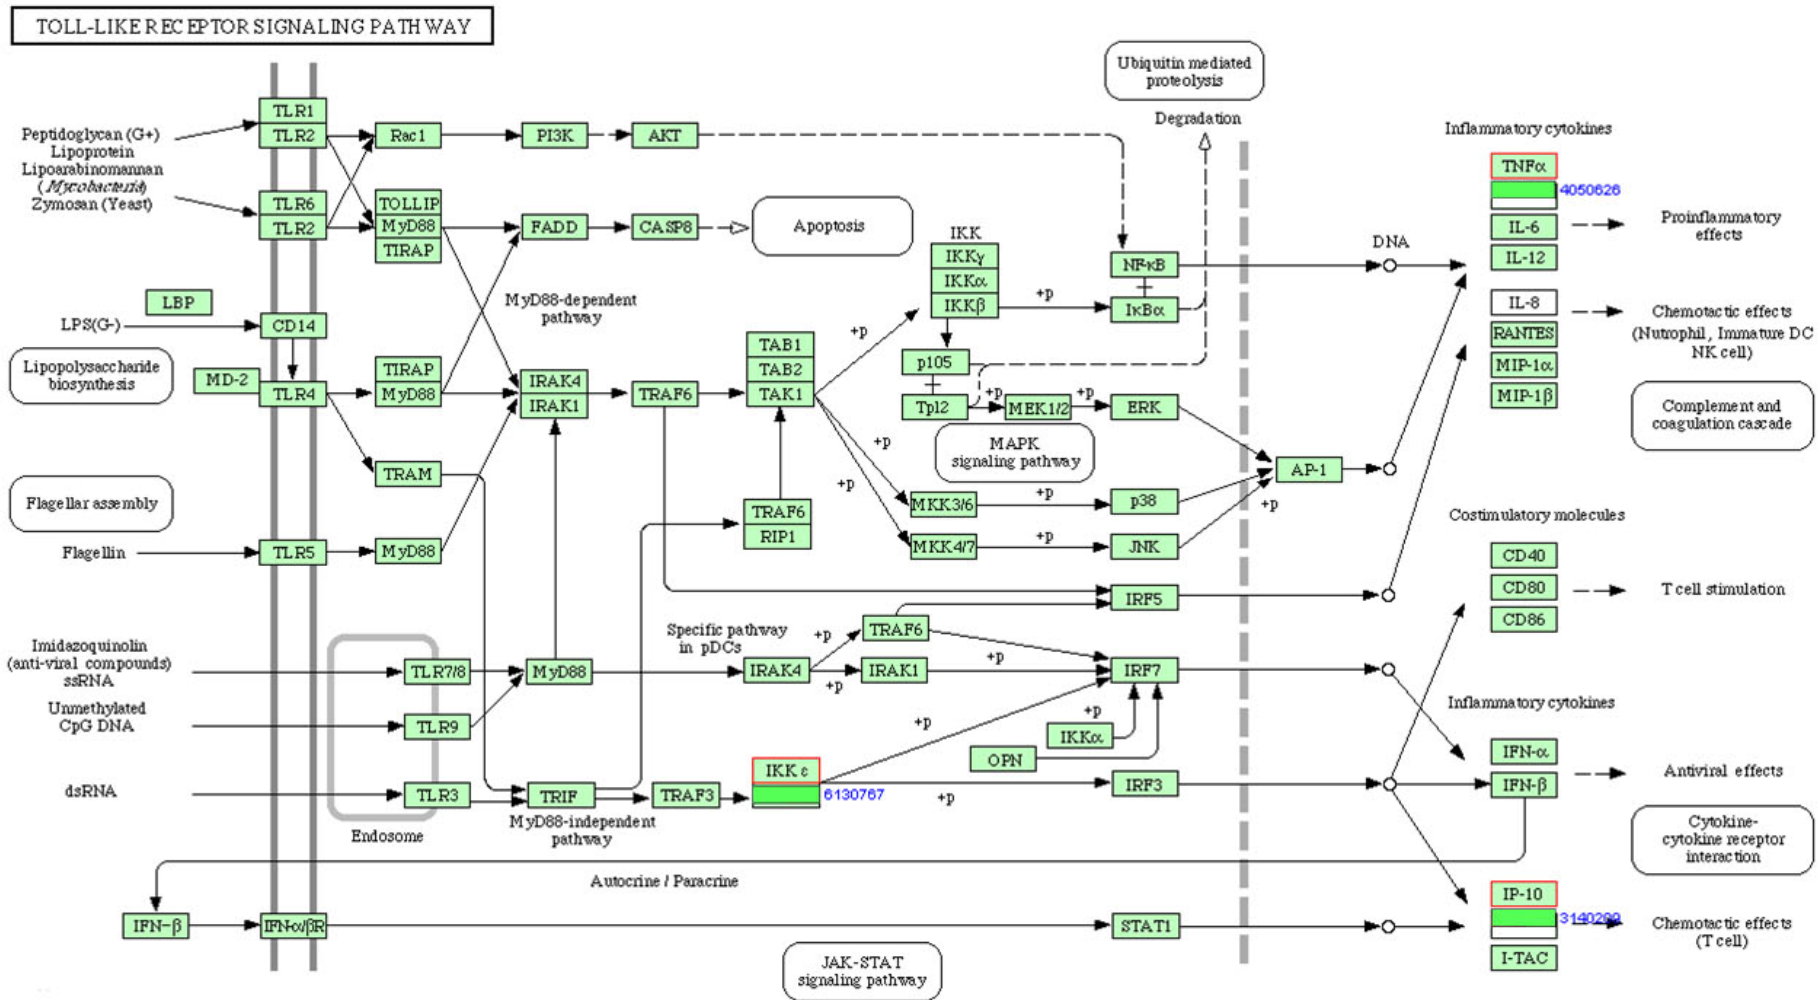

B

CYTOKINE-CYTOKINE RECEPTOR INTERACTION

Chemokines

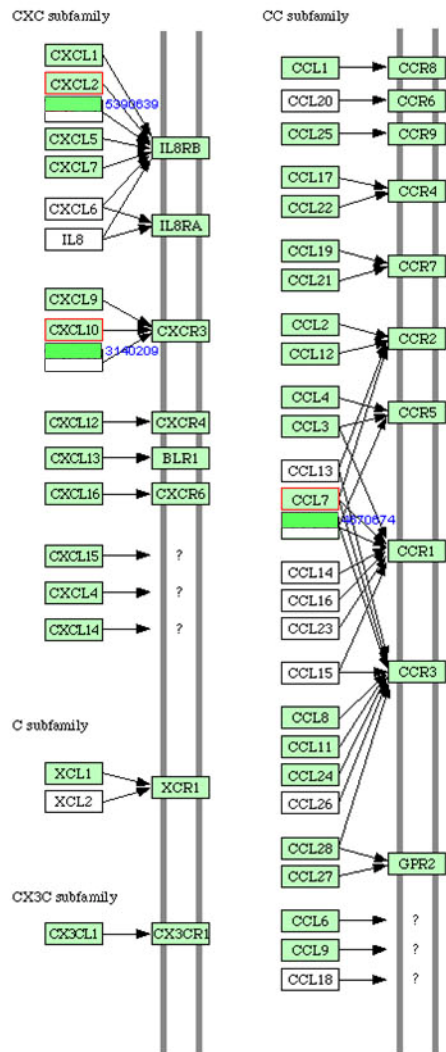

Hematopoietins

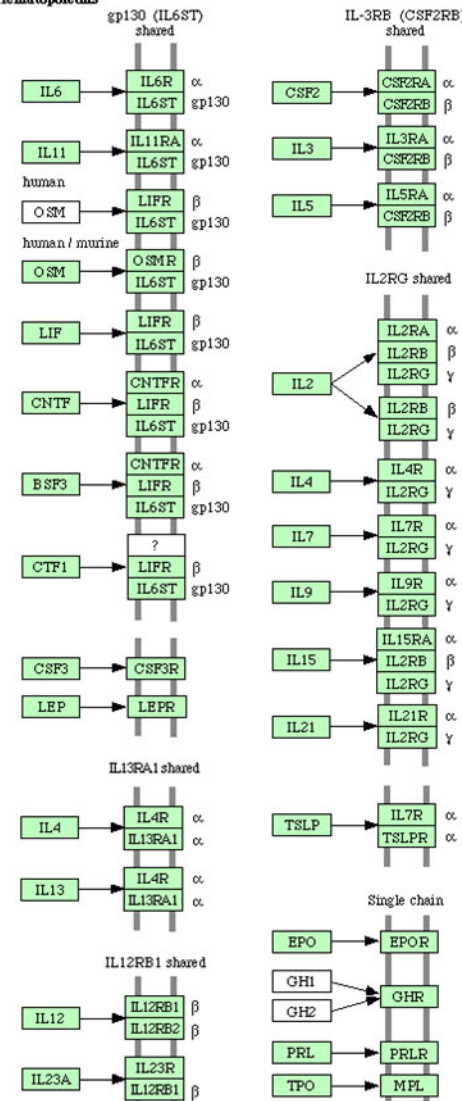

PDGF Family

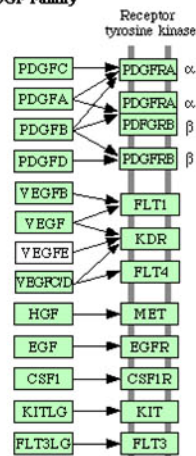

Interferon family

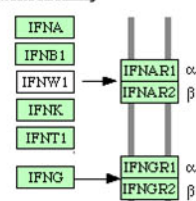

IL-10 family

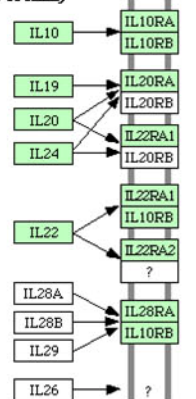

TNF family

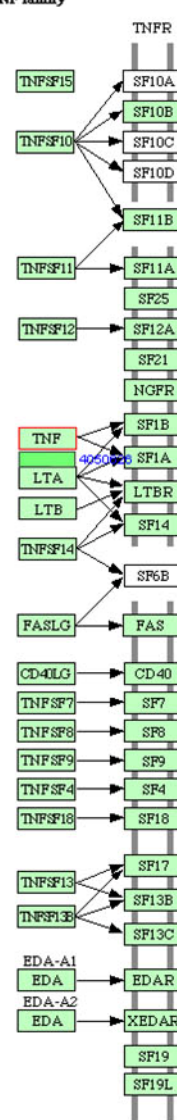

TGF-β family

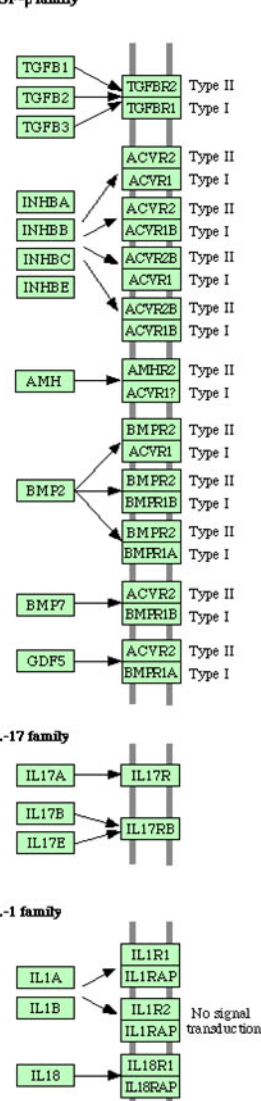

# Supplementary Figure 4

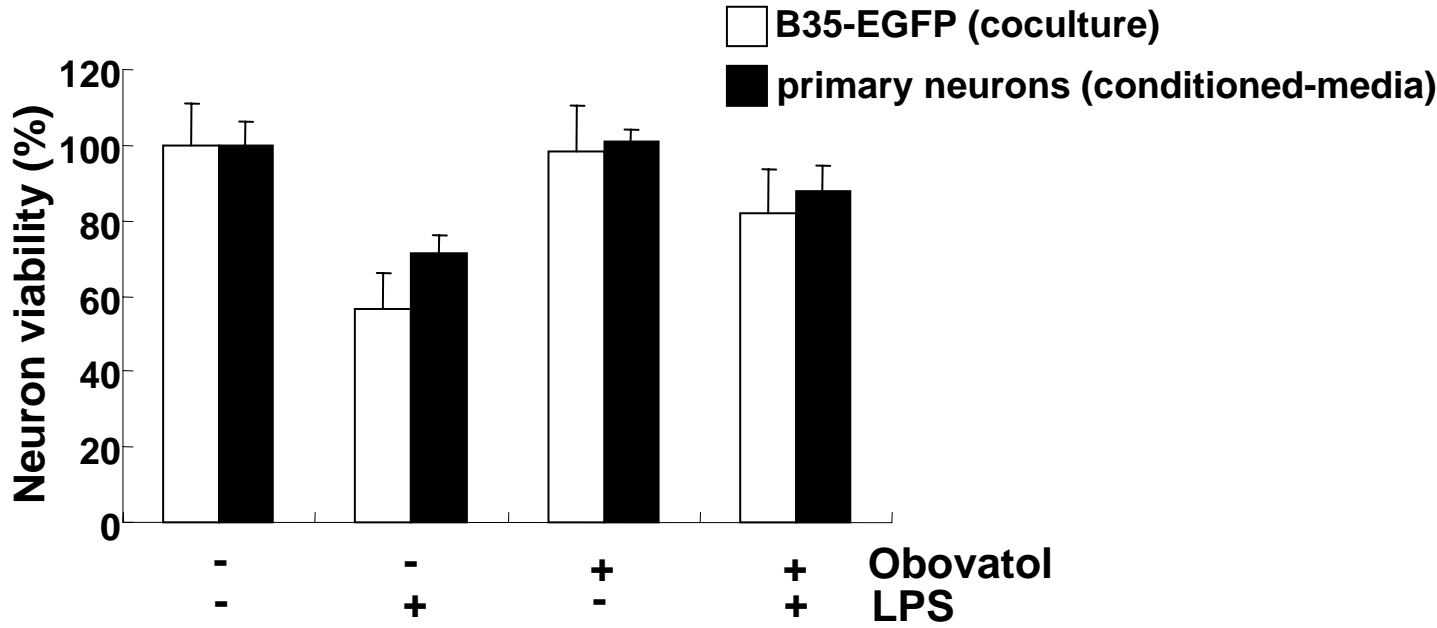

Supplement: bph0159-1646-SD1.pdf [file bph0159-1646-SD1.pdf]
